# Supplementary material for: Prefrontal PV interneurons facilitate attention and are linked to attentional dysfunction in a mouse model of absence epilepsy
Source: eLife. 2023 Apr 4;12:e78349. doi: 10.7554/eLife.78349 (PMC10072875; doi:10.7554/eLife.78349)
Supplement: Figure 6—source data 1. [file elife-78349-fig6-data1.xlsx]

## Sheet: Sheet1
	Feature List
	df/f Min/Max Normalized Median
	Min/Max Normalized Distribution Skew
	df/f Min/Max Normalized Distribution Skew
	Min/Max Normalized Time To Minimum
	Min/Max Normalized Time To Maximum
	df/f Min/Max Normalized Mean
	Min/Max Normalized Distribution Kurtosis
	Min/Max Normalized Mean
	Min/Max Normalized Median
	df/f Min/Max Normalized Distribution Kurtosis
	Minimum Value
	Min/Max Normalized Standard Deviation
	Min/Max Normalized Variance
	df/f Min/Max Normalized Time to Minimum
	Maximum Value
	df/f Min/Max Normalized Time to Maximim
	df/f Min/Max Normalized Standard Deviation
	df/f Min/Max Normalized Variance
	df/f Min/Max Normalized Standard Error Mean
	Min/Max Normalized Standard Error Mean
